# Supplementary material for: Freshwater food webs amplify microplastic transfer to fish
Source: Research Square preprint supplement (doi:10.21203/rs.3.rs-7554541/v1), 2025-09-30
Supplement: Supplementary file 1 [file 54732e377b794bb854236a24.pdf]

# Freshwater food webs amplify microplastic transfer to fish

Piotr Maszczyk<sup>a,\*</sup>, Ewa Babkiewicz<sup>a,b</sup>, Reid S. Brennan<sup>c</sup>, Marta Czarnocka-Cieciura<sup>a,d</sup>, Piotr Dawidowicz<sup>a</sup>, Michał Godlewski<sup>a</sup>, Katarzyna Jarosińska<sup>a</sup>, Selvaraj Kunijappan<sup>e</sup>, Jae-Seong Lee<sup>f</sup>, Jin-Sol Lee<sup>f</sup>, Konrad Leniowski<sup>g</sup>, Bohdan Paterczyk<sup>h</sup>, Monika Sysiak<sup>a</sup>, Maria Wierzbicka<sup>a</sup>, Zhou Yang<sup>i</sup>, Jacek Zebrowski<sup>j</sup>, Marcin Lukasz Zebrowski<sup>a</sup>

<sup>a</sup> Department of Hydrobiology, Institute of Ecology, Faculty of Biology, University of Warsaw, Warsaw, Poland

<sup>b</sup> Biological and Chemical Research Centre, University of Warsaw, Warsaw, Poland

<sup>c</sup> Marine Evolutionary Ecology, GEOMAR Helmholtz Centre for Ocean Research Kiel, Kiel, Germany

<sup>d</sup> National Information Processing Institute (OPI PIB), Warsaw, Poland

<sup>e</sup> Department of Biotechnology, Sethu Institute of Technology, Kariapatti 626115, Tamil Nadu, India

<sup>f</sup> Department of Biological Sciences, College of Science, Sungkyunkwan University, Suwon 16419, South Korea

<sup>g</sup> Faculty of Biology, Nature Protection and Sustainable Development, University of Rzeszow, Rzeszow, Poland

<sup>h</sup> Imaging Laboratory, Faculty of Biology, University of Warsaw, Warsaw, Poland

<sup>i</sup> Jiangsu Key Laboratory for Biodiversity and Biotechnology, School of Biological Sciences, Nanjing Normal University, Nanjing 210023, China

<sup>j</sup> Faculty of Biotechnology, University of Rzeszow, Rzeszow, Poland

**The following is included as supporting information for this paper:**

Number of figures: 4

---

\* Corresponding author: Piotr Maszczyk, e-mail [p.maszczyk@uw.edu.pl](mailto:p.maszczyk@uw.edu.pl)  
Department of Hydrobiology, Institute of Ecology, Faculty of Biology, University of Warsaw, Warsaw, Poland

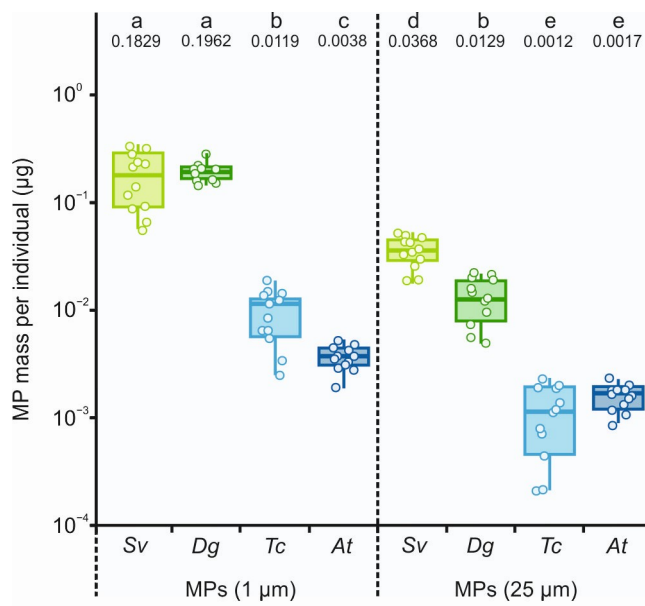

**Extended Data Fig. 1 | Freshwater zooplankton ingest more microplastics per individual than marine species.** Mean ingestion rates were significantly ( $\alpha = 0.05$ ) higher in freshwater species (*Simocephalus vetulus* [Sv], *Daphnia galeata* [Dg]) than in marine copepods (*Tigriopus californicus* [Tc], *Acartia tonsa* [At]) at both tested particle sizes (1 µm and 25 µm).

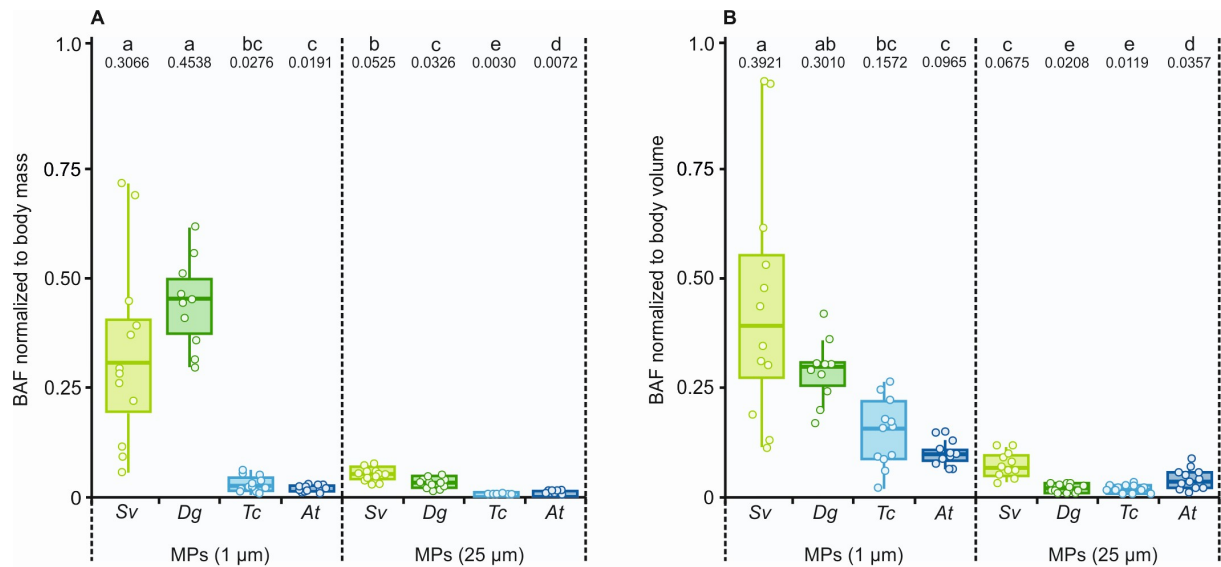

**Extended Data Fig. 2 | Bioaccumulation factors (BAFs) are higher in freshwater zooplankton than in marine species, particularly for smaller microplastics.** BAFs were calculated based on zooplankton body mass (A) and body volume (B) across treatments varying by microplastic size (1 µm and 25 µm) and species identity: *S. vetulus* (Sv, light green), *D. galeata* (Dg, dark green), *T. californicus* (Tc, light blue), and *A. tonsa* (At, dark blue). Boxplots show median values, interquartile ranges, and data spread; treatment medians are additionally displayed above each box. Y-axes are log10-scaled. Statistically distinct groups are indicated by different lowercase letters (see **Supplementary Tables 5 and 6**).

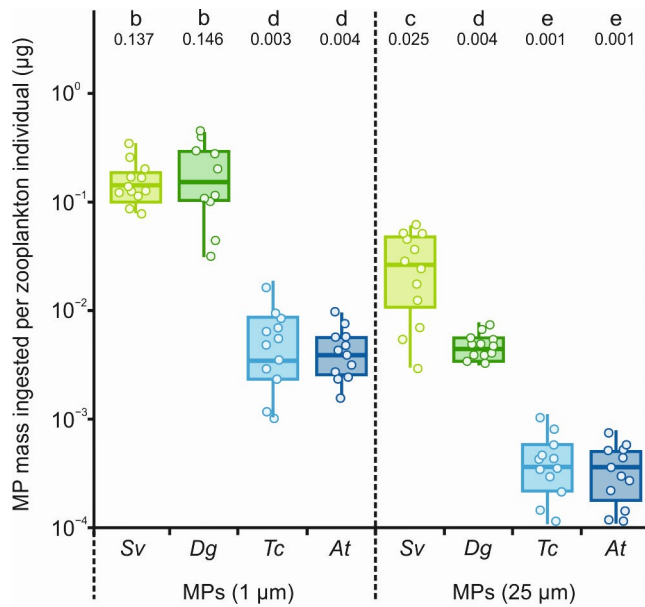

**Extended Data Fig. 3 | Trophic transfer of microplastics is more efficient via freshwater zooplankton than marine species.** Fish exposed to freshwater zooplankton (*S. vetulus* [Sv], *D. galeata* [Dg]) accumulated more microplastics per prey item than those fed marine copepods (*T. californicus* [Tc], *A. tonsa* [At]), reflecting enhanced vector potential. Statistically distinct groups are denoted by different lowercase letters (see **Supplementary Tables 7 and 8**).

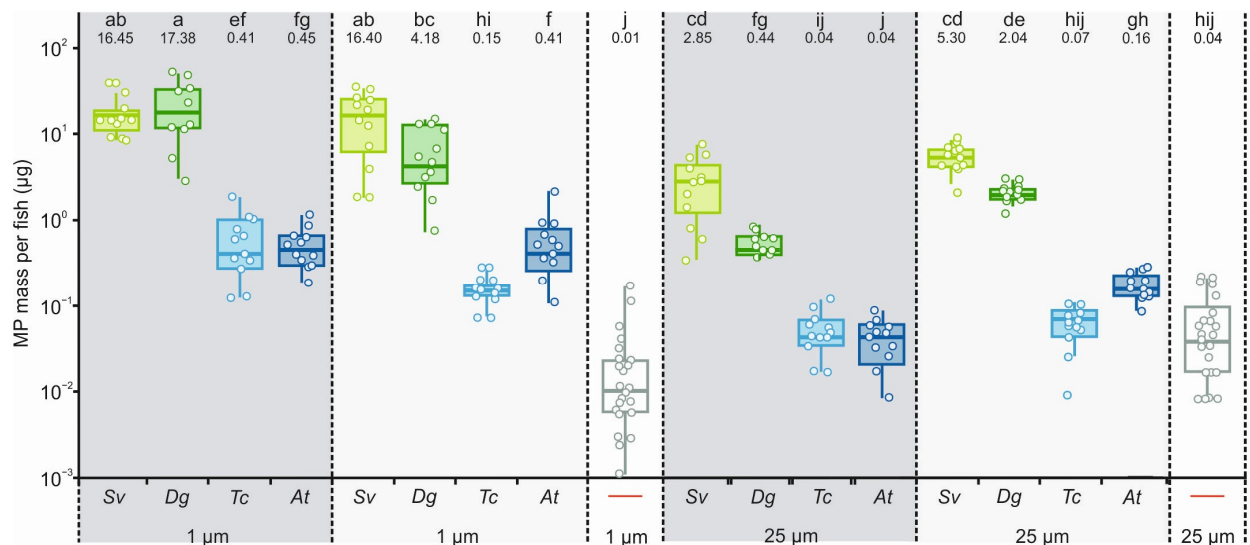

**Extended Data Fig. 4 | Fish ingest more microplastics via trophic transfer, particularly from freshwater zooplankton.** Microplastic mass in the fish gut across treatments differing by particle size (1 µm and 25 µm), zooplankton species (*S. vetulus* [Sv], *D. galeata* [Dg], *T. californicus* [Tc], *A. tonsa* [At]), and exposure mode. Background shading indicates trophic transfer (dark grey), direct ingestion in the presence of zooplankton (light grey), and direct ingestion without zooplankton (white; control = C). Boxplots display median values, interquartile ranges, and full data spread; treatment medians are shown above each box. Y-axis is log10-scaled. Statistically distinct groups are denoted by different lowercase letters (see Supplementary Tables 7 and 8).
